# Supplementary material
Source: MDPI journal article supplement (https://www.mdpi.com/2673-4583/5/1/35)
Supplement: s1 [file s1]

# **Statistical analysis for selective identifications of VOCs by using surface functionalized MoS<sub>2</sub> based sensor array**

---

**Presented By:  
Uttam Narendra Thakur**

# Outline

---

- Introduction
- Material and Methods
  - Preparation of MoS<sub>2</sub>
  - Sensor Fabrication
- Results and Discussion
  - VOC Sensing
  - Data Analysis
  - VOC Identification
- Conclusion

# Introduction

---

- ❑ Breath analysis gained a lot of interest for the non-invasive detection of diseases and monitoring health parameters.
- ❑ More than 1000 volatile organic components (VOCs) are present in the exhaled breath, only some of them are considered as diseases markers.
- ❑ The combination of a highly selective sensors and an effective machine learning can be used for early detection of diseases.
- ❑ Chemiresistive sensors is suitable for recognizing the target VOCs.
- ❑ Pattern recognition algorithms like k-nearest neighbor, Discriminant Function Analysis, support vector machine, random forest, logistic regression, etc. plays an essential role for classification of VOCs

# Material and Methods

---

□ **Preparation of MoS<sub>2</sub>**

□ **Sensor Fabrication**

# Preparation of MoS<sub>2</sub>

---

- ❑ All materials MoS<sub>2</sub> (Sigma Aldrich), gold (III) chloride (AuCl<sub>3</sub>, 99 %, Sigma Aldrich), palladium chloride (PdCl<sub>2</sub>, 60%, Molychem) and chloroplatinic acid (H<sub>4</sub>PtCl<sub>6</sub>·xH<sub>2</sub>O, 40 %, Molychem) were analytical grade and used without further any purification. 0.2 Wt% MoS<sub>2</sub> solution was prepared in deionized water and stirred for 1.5 h at room temperature to maintain homogeneity.
- ❑ Au, Pd and Pt nanoparticle loaded MoS<sub>2</sub> samples were prepared by spray coating technique. Firstly, MoS<sub>2</sub> solution was spray coated on washed SiO<sub>2</sub>/Si substrate and dried at room temperature.
- ❑ A thermal annealing was performed for 4 h at 250 °C to provide crystallization and thermal stability in all 4 samples (MoS<sub>2</sub>, Au-MoS<sub>2</sub>, Pd-MoS<sub>2</sub> and Pt-MoS<sub>2</sub>).

# Fabrication of Sensor

---

- ❑ Au source and drain electrodes of 150 nm thickness were deposited on all four samples by using electron beam evaporation unit.
- ❑ Sensors was then placed into a sensor holder and further sensing performance was studied.
- ❑ The sensing performance of prepared sensors was examined by static mode sensing setup where, VOCs were injected by using micro syringes (Hamilton micro syringe) and sensor was recovered by flowing 450 SCCM synthetic air by using mass flow controller.

# Results and Discussion

---

- VOC Sensing
- Data Analysis
- VOC Identification

# VOC Sensing

□ Synthetic air was used to perform the gas sensing measurements of four different sensors: pure  $\text{MoS}_2$ , Au-  $\text{MoS}_2$ , Pd-  $\text{MoS}_2$  and Pt-  $\text{MoS}_2$

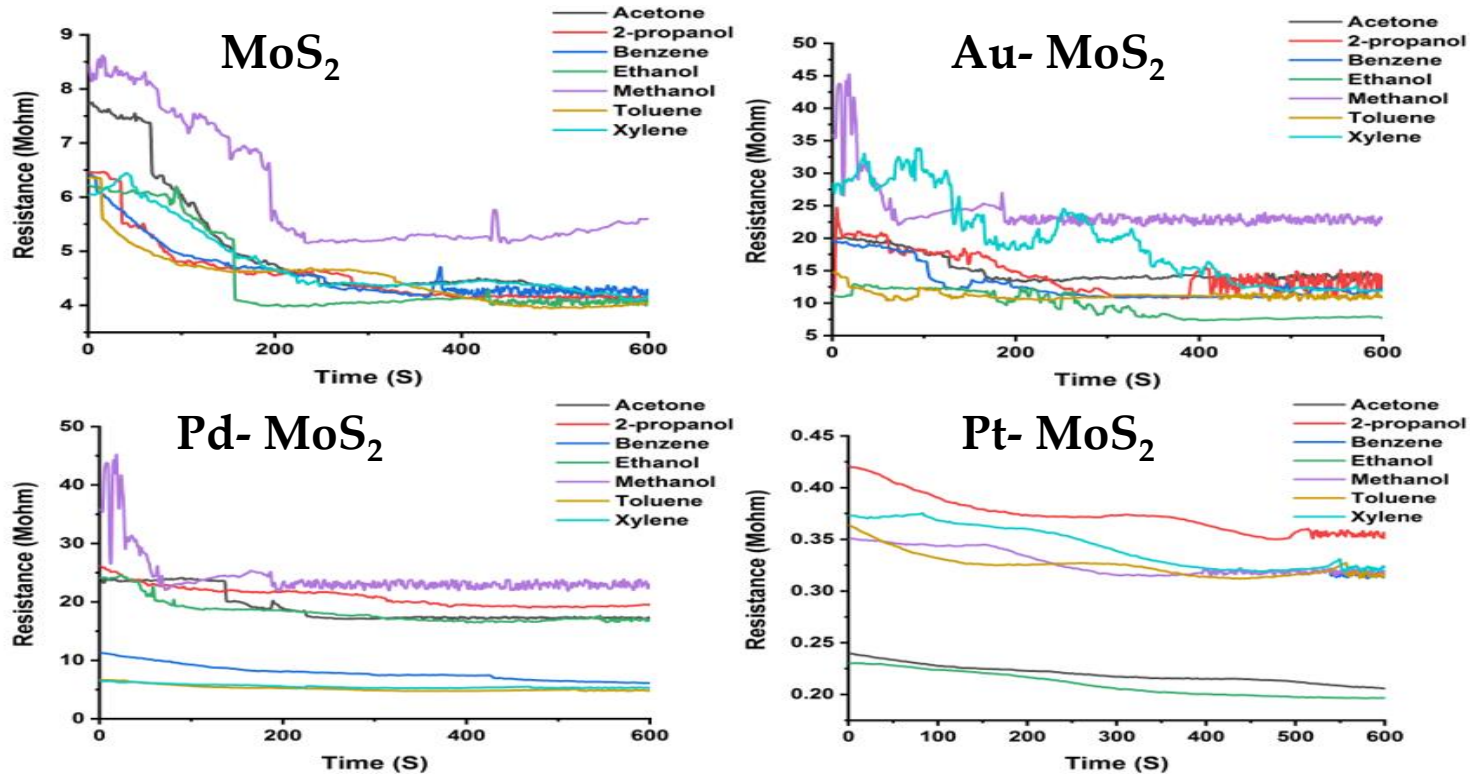



# Data Analysis

---

- ❑ The four different sensors for seven different VOCs was used for principal component analysis (PCA).
- ❑ LDA was also performed on the same data which was used for PCA

# PCA and LDA Output

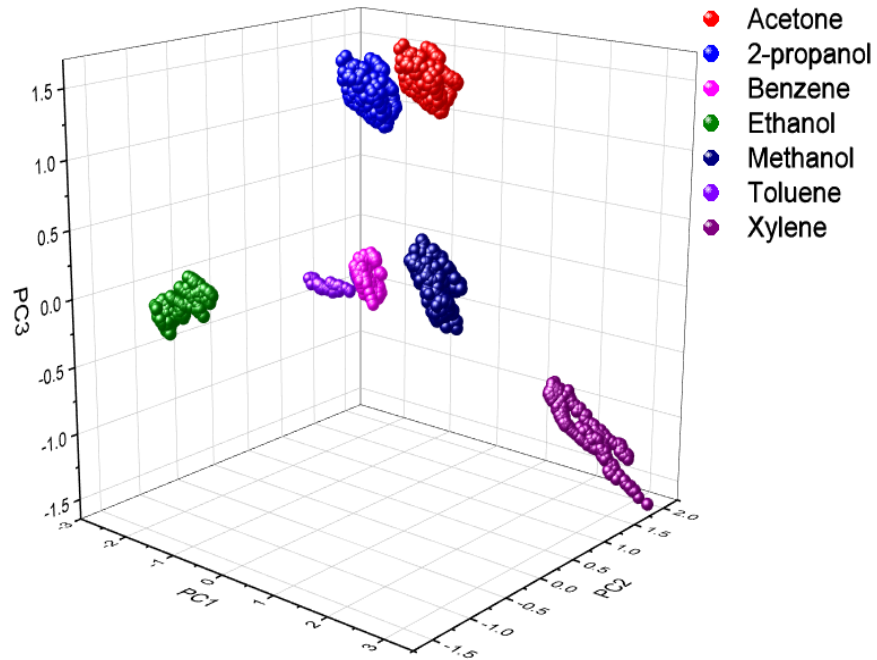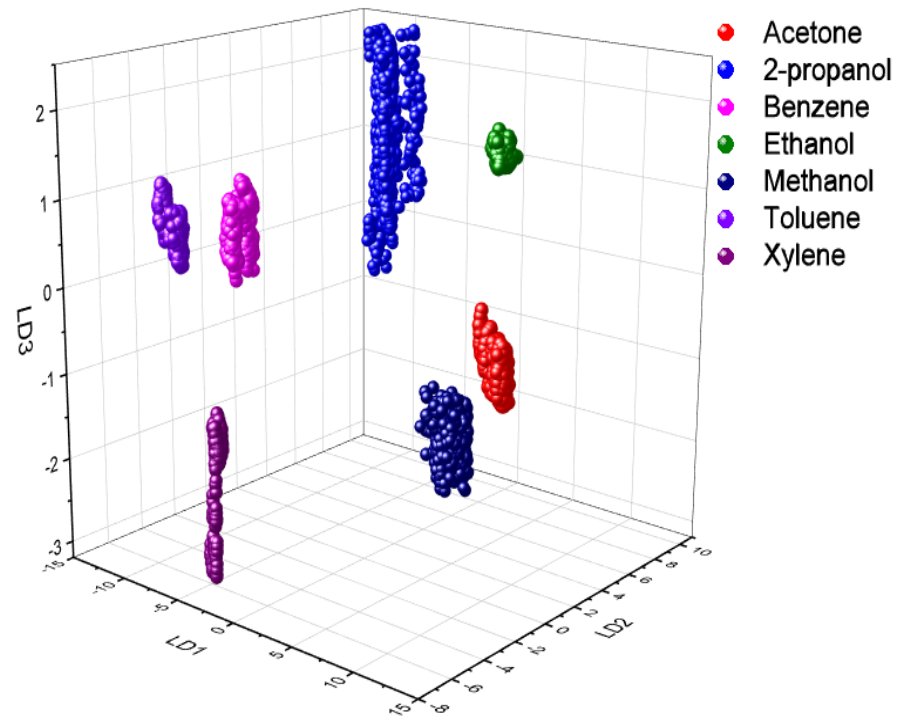

# VOC Identification

---

- ❑ Four different supervised algorithms were performed to determine the VOC
  - ❑ k-nearest neighbour (kNN)
  - ❑ Decision tree
  - ❑ Random forest
  - ❑ Multinomial logistic regression
  
- ❑ An accuracy of 97.14%, 92.43%, 84.1%, 98.97% was obtained for kNN, decision tree, random forest, and multinomial logistic regression, respectively.

# Confusion Matrix

(a)

| True Class \ Predicted Class | Acetone | Ethanol | 2-propenol | Benzene | Methanol | Xylene | Toluene |
|------------------------------|---------|---------|------------|---------|----------|--------|---------|
| Acetone                      | 178     | 4       | 0          | 1       | 0        | 0      | 0       |
| Ethanol                      | 0       | 174     | 0          | 0       | 0        | 0      | 0       |
| 2-propenol                   | 0       | 0       | 180        | 0       | 0        | 0      | 0       |
| Benzene                      | 0       | 10      | 0          | 165     | 0        | 0      | 0       |
| Methanol                     | 0       | 3       | 0          | 0       | 184      | 0      | 0       |
| Xylene                       | 0       | 0       | 0          | 0       | 0        | 172    | 7       |
| Toluene                      | 0       | 0       | 0          | 0       | 0        | 11     | 171     |

(b)

| True Class \ Predicted Class | Acetone | Ethanol | 2-propenol | Benzene | Methanol | Xylene | Toluene |
|------------------------------|---------|---------|------------|---------|----------|--------|---------|
| Acetone                      | 178     | 0       | 0          | 0       | 5        | 0      | 0       |
| Ethanol                      | 0       | 174     | 0          | 0       | 0        | 0      | 0       |
| 2-propenol                   | 0       | 0       | 158        | 0       | 0        | 22     | 0       |
| Benzene                      | 0       | 0       | 0          | 133     | 0        | 0      | 32      |
| Methanol                     | 24      | 0       | 0          | 0       | 163      | 0      | 0       |
| Xylene                       | 0       | 0       | 0          | 0       | 0        | 172    | 7       |
| Toluene                      | 0       | 0       | 0          | 5       | 0        | 0      | 187     |

(c)

| True Class \ Predicted Class | Acetone | Ethanol | 2-propenol | Benzene | Methanol | Xylene | Toluene |
|------------------------------|---------|---------|------------|---------|----------|--------|---------|
| Acetone                      | 136     | 0       | 0          | 0       | 0        | 47     | 0       |
| Ethanol                      | 0       | 147     | 0          | 0       | 27       | 0      | 0       |
| 2-propenol                   | 0       | 21      | 159        | 0       | 0        | 0      | 0       |
| Benzene                      | 0       | 0       | 0          | 107     | 0        | 0      | 58      |
| Methanol                     | 0       | 0       | 8          | 0       | 179      | 0      | 0       |
| Xylene                       | 0       | 10      | 0          | 0       | 0        | 169    | 0       |
| Toluene                      | 19      | 0       | 0          | 11      | 0        | 0      | 162     |

(d)

| True Class \ Predicted Class | Acetone | Ethanol | 2-propenol | Benzene | Methanol | Xylene | Toluene |
|------------------------------|---------|---------|------------|---------|----------|--------|---------|
| Acetone                      | 183     | 0       | 0          | 0       | 0        | 0      | 0       |
| Ethanol                      | 0       | 174     | 0          | 0       | 0        | 0      | 0       |
| 2-propenol                   | 0       | 0       | 180        | 0       | 0        | 0      | 0       |
| Benzene                      | 12      | 0       | 0          | 153     | 0        | 0      | 0       |
| Methanol                     | 0       | 0       | 0          | 0       | 187      | 0      | 0       |
| Xylene                       | 0       | 0       | 0          | 0       | 0        | 178    | 1       |
| Toluene                      | 0       | 0       | 0          | 0       | 0        | 0      | 192     |

- (a) k-nearest neighbour (kNN)
- (b) Decision tree
- (c) Random forest
- (d) Multinomial logistic regression

# Conclusion

---

- ❑ Among PCA and LDA, LDA laid out the excellent separation between VOCs
- ❑ k-nearest neighbour and multinomial logistic regression performed outstandingly with an accuracy of 97.14% and 98.97%, respectively.
- ❑ Thus, high selectivity and accuracy authenticate that the system discriminates and differentiates multiple VOCs popularly exists in human breath.

# References

---

1. S. Dragonieri, G. Pennazza, P. Carratu, and O. Resta, "Electronic Nose Technology in Respiratory Diseases," *Lung*, vol. 195, no. 2, pp. 157–165, 2017, doi: 10.1007/s00408-017-9987-3.
2. P. Sahatiya, A. Kadu, H. Gupta, P. Thanga Gomathi, and S. Badhulika, "Flexible, Disposable Cellulose-Paper-Based MoS<sub>2</sub>/Cu<sub>2</sub>S Hybrid for Wireless Environmental Monitoring and Multifunctional Sensing of Chemical Stimuli," *ACS Appl. Mater. Interfaces*, vol. 10, no. 10, pp. 9048–9059, Mar. 2018, doi: 10.1021/acsami.8b00245.
3. F. S. Cikach and R. A. Dweik, "Cardiovascular Biomarkers in Exhaled Breath," *Prog. Cardiovasc. Dis.*, vol. 55, no. 1, pp. 34–43, 2012, doi: 10.1016/j.pcad.2012.05.005.
4. J. Pereira *et al.*, "Breath analysis as a potential and non-invasive frontier in disease diagnosis: An overview," *Metabolites*, vol. 5, no. 1, pp. 3–55, 2015, doi: 10.3390/metabo5010003.
5. K. Arshak, E. Moore, G. M. Lyons, J. Harris, and S. Clifford, "A review of gas sensors employed in electronic nose applications," *Sens. Rev.*, vol. 24, no. 2, pp. 181–198, 2004, doi: 10.1108/02602280410525977.
6. V. H. Tran *et al.*, "Breath analysis of lung cancer patients using an electronic nose detection system," *IEEE Sens. J.*, vol. 10, no. 9, pp. 1514–1518, 2010, doi: 10.1109/JSEN.2009.2038356

# References

---

7. A. Pundt, "Hydrogen in Nano-sized Metals," *Adv. Eng. Mater.*, vol. 6, no. 12, pp. 11–21, Feb. 2004, doi: 10.1002/adem.200300557.
8. A. Hazra, "Amplified Methanol Sensitivity in Reduced Graphene Oxide FET Using Appropriate Gate Electrostatic," *IEEE Trans. Electron Devices*, vol. 67, no. 11, pp. 5111–5118, Nov. 2020, doi: 10.1109/TED.2020.3025743.
9. T. Gakhar and A. Hazra, "Oxygen vacancy modulation of titania nanotubes by cathodic polarization and chemical reduction routes for efficient detection of volatile organic compounds," *Nanoscale*, vol. 12, no. 16, pp. 9082–9093, 2020, doi: 10.1039/c9nr10795a.
10. E. Kanazawa *et al.*, "Metal oxide semiconductor N<sub>2</sub>O sensor for medical use," *Sensors Actuators B Chem.*, vol. 77, no. 1–2, pp. 72–77, Jun. 2001, doi: 10.1016/S0925-4005(01)00675-X.
11. H. Bai and G. Shi, "Gas Sensors Based on Conducting Polymers," *Sensors*, vol. 7, no. 3, pp. 267–307, Mar. 2007, doi: 10.3390/s7030267.
12. V. Selamneni, H. Raghavan, A. Hazra, and P. Sahatiya, "MoS<sub>2</sub>/Paper Decorated with Metal Nanoparticles (Au, Pt, and Pd) Based Plasmonic-Enhanced Broadband (Visible-NIR) Flexible Photodetectors," *Adv. Mater. Interfaces*, vol. 8, no. 6, p. 2001988, Mar. 2021, doi: 10.1002/admi.202001988.

# Thank You

---
